RESEARCH ARTICLE

# Birth Weight and Adult IQ, but Not Anxious-Depressive Psychopathology, Are Associated with Cortical Surface Area: A Study in Twins

Aldo Córdova-Palomera<sup>1,2</sup>, Mar Fatjó-Vilas<sup>1,2</sup>, Carles Falcón<sup>3,4</sup>, Nuria Bargalló<sup>2,3,5</sup>, Silvia Alemany<sup>1,2</sup>, Benedicto Crespo-Facorro<sup>2,6,7</sup>, Igor Nenadic<sup>8</sup>, Lourdes Fañanás<sup>1,2\*</sup>

**1** Unidad de Antropología, Departamento de Biología Animal, Facultad de Biología and Instituto de Biomedicina (IBUB), Universitat de Barcelona, Av. Diagonal, 643, 08028, Barcelona, Spain, **2** Centro de Investigaciones Biomédicas en Red de Salud Mental (CIBERSAM), C/Doctor Esquerdo, 46, 28007, Madrid, Spain, **3** Medical Image Core Facility, the Institut d'Investigacions Biomèdiques August Pi i Sunyer (IDIBAPS), C/Rosselló, 149–153, 08036, Barcelona, Spain, **4** Centro de Investigación Biomédica en Red en Bioingeniería, Biomedicina y Nanomedicina (CIBER-BBN), C/ Poeta Mariano Esquillor, s/n., 50018, Zaragoza, Spain, **5** Centro de Diagnóstico por Imagen, Hospital Clínico, C/Villaruel, 170, 08036, Barcelona, Spain, **6** University Hospital Marqués de Valdecilla, Department of Psychiatry, School of Medicine, University of Cantabria, Av. Valdecilla, s/n, 39008, Santander, Cantabria, Spain, **7** IFIMAV, Instituto de Formación e Investigación Marqués de Valdecilla, Av. Valdecilla, s/n, 39008, Santander, Cantabria, Spain, **8** Department of Psychiatry and Psychotherapy, Jena University Hospital, Friedrich Schiller University Jena, Philosophenweg 3, 07743, Jena, Germany

\* [lfananas@ub.edu](mailto:lfananas@ub.edu)

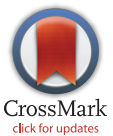

**OPEN ACCESS**

**Citation:** Córdova-Palomera A, Fatjó-Vilas M, Falcón C, Bargalló N, Alemany S, Crespo-Facorro B, et al. (2015) Birth Weight and Adult IQ, but Not Anxious-Depressive Psychopathology, Are Associated with Cortical Surface Area: A Study in Twins. PLoS ONE 10(6): e0129616. doi:10.1371/journal.pone.0129616

**Academic Editor:** Judith Homberg, Radboud University, NETHERLANDS

**Received:** November 5, 2014

**Accepted:** May 11, 2015

**Published:** June 18, 2015

**Copyright:** © 2015 Córdova-Palomera et al. This is an open access article distributed under the terms of the [Creative Commons Attribution License](https://creativecommons.org/licenses/by/4.0/), which permits unrestricted use, distribution, and reproduction in any medium, provided the original author and source are credited.

**Data Availability Statement:** Some access restrictions apply to the data underlying the findings. All data underlying the findings in this study are available only upon request because of an ethical restriction. As mentioned in the Ethics statement section of the manuscript, human participants gave written informed consent to be included in the study (Comissió de Bioètica de la Universitat de Barcelona; Institutional Review Board registry IRB00003099; Assurance number: FWA00004225; <http://www.ub.edu/reerca/comissiobioetica.htm>). In their signed consent forms, all participants agree to collaborate by

## Abstract

### Background

Previous research suggests that low birth weight (BW) induces reduced brain cortical surface area (SA) which would persist until at least early adulthood. Moreover, low BW has been linked to psychiatric disorders such as depression and psychological distress, and to altered neurocognitive profiles.

### Aims

We present novel findings obtained by analysing high-resolution structural MRI scans of 48 twins; specifically, we aimed: i) to test the BW-SA association in a middle-aged adult sample; and ii) to assess whether either depression/anxiety disorders or intellectual quotient (IQ) influence the BW-SA link, using a monozygotic (MZ) twin design to separate environmental and genetic effects.

### Results

Both lower BW and decreased IQ were associated with smaller total and regional cortical SA in adulthood. Within a twin pair, lower BW was related to smaller total cortical and regional SA. In contrast, MZ twin differences in SA were not related to differences in either IQ or depression/anxiety disorders.

allowing the research group "Gens i ambient en la comprensió de la diversitat de la conducta humana i de la etiopatogenia de la malaltia mental", led by Prof. Dr. Lourdes Fañanás, member of the Institute of Biomedicine of the University of Barcelona (IBUB; Address: Departament de Bioquímica i Biologia Molecular, Facultat de Biologia, Universitat de Barcelona. Avda. Diagonal, 645. 08028. Barcelona, Spain. Phone: (+34) 934 021 525. [www.ub.edu/ibub/](http://www.ub.edu/ibub/)). Data requests may be addressed to the IBUB using these contact details.

**Funding:** This work was supported by the Spanish SAF2008-05674, European Twins Study Network on Schizophrenia Research Training Network (grant number EUTwinsS; MRTN-CT-2006-035987), the Catalan 2014SGR1636 and the PIM2010-ERN-00642 in frame of ERA-NET NEURON. A. Córdova-Palomera was funded by The National Council for Science and Technology (CONACyT, Mexico). The funders had no role in study design, data collection and analysis, decision to publish, or preparation of the manuscript.

**Competing Interests:** The authors have declared that no competing interests exist.

## Conclusion

The present study supports findings indicating that i) BW has a long-lasting effect on cortical SA, where some familial and environmental influences alter both foetal growth and brain morphology; ii) uniquely environmental factors affecting BW also alter SA; iii) higher IQ correlates with larger SA; and iv) these effects are not modified by internalizing psychopathology.

## Introduction

Human neurodevelopment is a highly intricate, stage-dependent, dynamic, lifetime process. Early periods of growth are of particular importance due to their enduring impact on the remaining sequence of anatomical maturational processes. In fact, intrauterine and neonatal brain insults have been shown to have a long-term impact on behaviour and neurological outcomes [1,2].

Factors such as prematurity and very low birth weight (BW) have been related to altered cortical brain features later in life [3–5]. As genetic and environmental influences modify brain features differently across stages [6] Bystron et al., 2008), studying which early modifications of the human cortex have long-lasting effects—and their potential origins, both genetic and non-genetic—may shed light on human brain maturational processes and their consequences for cognitive functioning, and mental health and disease.

Accordingly, models of developmental vulnerability to adult psychopathology have recently been fostered by twin and magnetic resonance imaging (MRI) studies. They have demonstrated that both genetic and environmental influences play a role in abnormal neurocognition and related mental health issues [7]. Genetically informative neuroimaging approaches have contributed considerably to the discipline of developmental psychopathology, since they allow links between genes, brain structure/function, and neurocognitive profiles associated with both normal and pathological psychological traits to be ascertained [8–10].

More explicitly, three recent MRI studies have consistently shown that BW variation within a normal range has an effect on cortical features detectable in children, adolescents and young adults. This effect seems to be environmentally driven and independent of major psychiatric diagnoses. Specifically, the findings indicate that BW has long-term consequences on total and regional cortical surface area (SA), but not on cortical thickness [11–13]. This is consistent with previous research showing that cortical thickness and surface are two phenotypes highly independent at the genetic level [14], which suggests their alterations could be associated to relatively distinct neuropsychiatric outcomes.

The direction of the association is the same in these studies: low BW individuals show reduced cortical SA. Nevertheless, reductions of cortical SA have been found in different regions when directly analysing the relationship between BW and SA [11, 13], from those when the focus is exclusively on environmental influences on BW, as measured by monozygotic (MZ) twin difference designs [12]. Given that MZ twins have the same genetic background, their phenotypic dissimilarities are believed to be environmentally-induced. Accordingly, the slight contrast in previous reports may indicate that the variety of genetic and environmental factors influencing BW [15,16] can alter cortical anatomy in specific ways. Remarkably, cortical brain surface alterations found by these authors are located in areas with relevance for psychiatric research, such as the temporal, superior frontal and cingulate regions [17–19].

As concluded by Walhovd et al. [13], BW differences across diagnostic groups and conditions may influence differences observed in cortical parameters assessed later in life in neuroimaging research. The present study aims to address three considerations in this regard.

First, it has been reported that human intelligence, measured by IQ, could correlate with brain volume [20,21]. Moreover, altered cognitive capabilities have been related to low BW [22,23]. Skranes et al. [4] reported that cognitive impairments in very-low-BW young adults may be due to decreases in cortical SA caused by altered foetal growth trajectories. It has similarly been proposed that both depressive and anxious pathologies are associated with lower IQ [24], which means both cortical SA and IQ need to be included when analysing the association between BW and cortical variables. Also, a phenotypic correlation between cognitive abilities and cortical SA has been shown in healthy individuals, with genetic factors accounting for ~86% of the association [25]. Hence, genetically informative designs (i.e., studies of MZ twins) may allow us to determine whether the proposed alteration of BW and SA due to uniquely environmental factors [12] holds independently of (likewise) environmental influences on IQ or internalizing psychopathology.

Secondly, there is some—so far inconclusive—evidence of fetal growth alterations as risk factor for adult internalizing disorders (namely, depression and psychological distress) [26,27]. Several cortical morphological brain alterations have been related to these psychopathological states [28–31]. Current evidence suggests that anxious and depressive disorders exhibit a wide degree of comorbidity, a common etiopathology and diagnostic criterion overlap [32–35]. This is probably reflected as shared brain morphometry alterations [36,37] and may also induce SA changes.

Finally, as different patterns of change in cortical and subcortical structures emerge across successive stages of normal development [38], the age range across which the BW-SA link is valid remains unidentified.

Hence, while the previous associations have consistently been demonstrated in children, adolescents and young adults, further verification in older samples is still necessary. Besides, no previous study has evaluated the potential role of anxious-depressive psychopathology in altering these associations.

Our study aims: i) to test the previously identified associations (BW-SA; and MZ differences in both BW and SA) using a sample of middle-aged adults; and ii) to evaluate whether such associations persist regardless of internalizing (anxious-depressive) disorders and differences in IQ profiles.

## Methods

### Ethics statement

Written informed consent was obtained from all participants after a detailed description of the study aims and design, approved by the institutional ethics committee (Comissió de Bioètica de la Universitat de Barcelona (CBUB); Institutional Review Board registry IRB00003099; Assurance number: FWA00004225; <http://www.ub.edu/recerca/comissiobioetica.htm>). All procedures were in accordance with the Declaration of Helsinki.

### Sample description

Participants of this study were part of a larger twin sample consisting of 242 European descent Spanish adult twins from the general population who gave permission to be contacted for research purposes. The current sample consisted of a 54-individual (27-twin-pair) subset of participants extracted from the initial group. For the current sample, the exclusion criteria

applied included age under 18 and over 65, a medical history of neurological disturbance, presence of sensory or motor alterations and current substance misuse or dependence.

Medical records and a battery of psychological and neurocognitive tests were obtained in face-to-face interviews by trained psychologists. Additionally, peripheral blood or saliva samples were obtained from all participants, and zygosity of the pairs was determined by genotyping 16 highly polymorphic microsatellite loci from DNA samples (SSRs; PowerPlex 16 System Promega Corporation). Identity on all the markers can be used to assign monozygosity (i.e., whether twins of a given pair were born from a single fertilized ovum, and are so identical at the DNA sequence level) with greater than 99% accuracy [39].

From the previous sample, a group of 54 middle-aged participants (27 MZ twin pairs; age range 22–56, median age 38; 47% female), who were informative for psychopathology, neurocognition and early stress factors, accepted to participate in an ongoing research project relating cognitive performance, brain function and epigenetic signatures.

The twins included in this subset of 54 participants met the following criteria: a) age at scan between 20 and 56 years, b) both twins right-handed and c) neither twin had a lifetime diagnosis other than depression and/or anxiety. Pairs where one or both twins met the criteria for a lifetime psychiatric diagnosis other than depression or anxiety, or with either neurological or major medical illnesses, were excluded (see *c. Clinical and Neurocognitive Assessment*).

After this point, due to image artifacts and a lack of data on some participants, the final sample (i.e., the subset included in all the statistical analysis) consisted of 48 individuals (24 twin pairs) (mean (SD) age = 36 (11) years; 42% male); there were 6 diagnosis-concordant (anxiety/depression) and 8 diagnosis-discordant pairs, and 10 healthy control twin pairs. All analyses described below refer to this 48-individual sample. Further demographic and descriptive details of this group of twins can be found elsewhere [40] and below.

## Clinical and Neurocognitive Assessment

A trained clinical psychologist applied the Structural Clinical Interview for DSM-IV Axis I Disorders (SCID-I) [41] in a face-to-face interview to screen for the presence of any lifetime depression (major depressive disorder or depressive disorder not otherwise specified) or anxiety spectrum disorders (panic disorder with/without agoraphobia, specific/social phobia, generalized anxiety disorder, agoraphobia without history of panic disorder, anxiety disorder not otherwise specified or obsessive-compulsive disorder).

Individuals meeting the diagnostic criteria for at least one lifetime diagnosis of anxiety or depression were classified as affected by a stress-related disorder, and “concordant”, “discordant” and “healthy” statuses of twin pairs were defined accordingly (Table 1). Most of the affected individuals in this sample experienced a first episode of any anxiety or depressive psychopathology during their adolescence, consistent with previous epidemiological data [42].

Intelligence quotient (IQ) was estimated from five subtests (block design, digit span, matrix reasoning, information and vocabulary) of the Wechsler Adult Intelligence Scale (WAIS-III) [43,44] by trained psychologists.

Participants were asked to report if they had received pharmacological or psychological treatment or had consulted a psychiatrist or psychologist since they first participated in the study. Only three individuals had life-time exposure to drug treatment for anxiety or depression.

## Birth weight

Information on obstetric complications was collected by direct interviews with the participants' mothers [45] by means of the Lewis-Murray Obstetric Complications Scale [46]. BW

**Table 1. Demographic, clinical, neurocognitive, obstetric and cortical variables for concordant, discordant and healthy MZ twin pairs.**

|                                             | CONCORDANT (12 subjects) |               | DISCORDANT (16 subjects) |               | HEALTHY (20 subjects) |               | Group comparison                 |
|---------------------------------------------|--------------------------|---------------|--------------------------|---------------|-----------------------|---------------|----------------------------------|
|                                             | Number of individuals    | %             | Number of individuals    | %             | Number of individuals | %             | X-square <sup>a</sup> ; <i>p</i> |
| Gender (m/f)                                | 2/10                     | 16.6/83.3     | 6/10                     | 37.5/62.5     | 12/8                  | 60/40         | 5.97; 0.052                      |
| Depression <sup>+</sup>                     | 4                        | 16.6          | 4                        | 12.5          | -                     | -             | -                                |
| Anxiety <sup>+</sup>                        | 6                        | 25            | 1                        | 3.1           | -                     | -             | -                                |
| Comorbid <sup>+</sup>                       | 2                        | 8.3           | 3                        | 9.4           | -                     | -             | -                                |
|                                             | Mean (SD)                | Range         | Mean (SD)                | Range         | Mean (SD)             | Range         | X-square <sup>b</sup> ; <i>p</i> |
| Age                                         | 40.8 (13.3)              | 23–56         | 33.1 (12.2)              | 20–53         | 35.2 (7.9)            | 22–48         | 3.34; 0.188                      |
| IQ                                          | 103 (13.7)               | 83–127        | 106.3 (11.6)             | 87–131        | 107.4 (6.9)           | 96–118        | 0.9; 0.639                       |
| BW (grams)                                  | 2625 (508)               | 1900–3360     | 2421 (424)               | 1800–3000     | 2482 (536)            | 1400–3350     | 1.17; 0.557                      |
| ICV (cm <sup>3</sup> )                      | 1282 (257)               | 890–1592      | 1420 (212)               | 1106–1829     | 1533 (78)             | 1440–1719     | 9.42; 0.009*                     |
| Total SA (mm <sup>2</sup> )                 | 152600 (15287)           | 136200–174500 | 159900 (17158)           | 133500–185600 | 164400 (8658)         | 151900–182400 | 3.53; 0.172                      |
| Intrapair BW diff. (grams)                  | 303 (361)                | 50–1000       | 334 (336)                | 100–1000      | 315 (277)             | 0–1000        | 0.41; 0.82                       |
| Intrapair IQ diff.                          | 6.7 (7.2)                | 1–18          | 6.6 (4.6)                | 1–13          | 4.4 (3.9)             | 0–12          | 1.16; 0.56                       |
| Intrapair total SA diff. (mm <sup>2</sup> ) | 2425 (1960)              | 144–5399      | 5874 (5765)              | 275–17330     | 3191 (3515)           | 109–9772      | 1.22; 0.542                      |

Abbreviations: m = males; f = females;

<sup>+</sup> = lifetime diagnoses according to the Diagnostic and Statistical Manual of Mental Disorders; SD = standard deviation; IQ = intellectual quotient;

BW = birth weight; ICV = total intracranial volume; SA = surface area

<sup>a</sup> = X-square and *p*-value estimates for gender data were obtained using Monte Carlo tests with 10<sup>6</sup> replicates

<sup>b</sup> = Kruskal-Wallis X-square, as these variables were continuous

\* = statistically significant *p*-value.

doi:10.1371/journal.pone.0129616.t001

distribution by gestational age of all the subjects in the sample was in accordance with a previous report of Caucasian twins [47].

## MRI acquisition and postprocessing

High-resolution 3D structural datasets, using a T1-weighted magnetization-prepared rapid gradient echo, were acquired at the MRI Unit of the Image Platform (IDIBAPS, Hospital Clínic de Barcelona) by means of a TIM TRIO 3 T scanner (Siemens, Erlangen, Germany), with the parameters: 3D T1-weighted MPRAGE sequence, TR = 2300 ms, TE = 3.03 ms, TI = 900 ms, flip angle = 9°, 192 slices in the sagittal plane, matrix size = 256×256, 1 mm<sup>3</sup> isometric voxel, 8-channel coil.

MRI scans were processed and analysed using the freely available software FreeSurfer (version 5.1.0; <http://surfer.nmr.mgh.harvard.edu/>), run on Ubuntu with the Linux 2.6.28-11-generic kernel. Further technical details of FreeSurfer can be found in the literature [48–52].

Cortical SA was measured over the interface between grey and white matter, at the so-called *white matter surface*, as this matches a morphological trait and has lower sensitivity to cortical thickness than the outermost surface [53]. The cerebral cortex was parcellated into 148 units (hereafter regions; 74 per hemisphere) based on gyral and sulcal structure [54]. Cortical SA measurements were obtained for all the subjects for each region and for the total cortical mantle. Regions of interest (ROIs) were defined from previous reports (see *Statistical analysis*), by combining some of the 148 available regions. Afterwards, total intracranial volume (ICV) was

estimated [55]. As volume estimates do not increase linearly with SA parameters, ICV was raised to the power of 0.754 (hereafter  $ICV^{0.754}$ ) for later use as a covariate in statistical analysis. Both the cortical parcellation and intracranial volume calculation procedures have been validated against manual measurements (for details, see references above).

These procedures were fully automated; all scans were visually inspected, and slight manual corrections were applied when necessary, following standard procedures. General information on total SA and ICV measurements for the sample are given in [Table 1](#).

## Selection of MRI variables and statistical analysis

Cortical SA across the 148 regions of all 48 subjects were exported as a data matrix, and all statistical analysis was performed in the R Statistical Software [56]. Four different analyses based on multivariate linear regressions were performed. ICV was used as a covariate, given its potential to correlate with general brain features [14].

First, in order to test for associations between raw BW measures and SA phenotypes across the 48 individuals (i.e., considering each twin as an independent observation), linear mixed-effects (LME) models were implemented [57] using SA measurements (in square millimetres) from the dataset mentioned above. LME models allow corrections to be made for the correlated nature of data from twin pairs, thus providing appropriate regression estimates for specific outcomes of interest (here, SA of either total cerebral cortex or each of nine ROIs). Following previous reports on statistical analysis of twin data [58–60], pair id was included as a random effect, to apply a “random” shift in the intercept to both twins in every pair.

Consequently, the initial analysis implemented an LME regression to test for an association between BW, diagnostic status and a measure of total SA, controlling for gender, age, ICV and weeks of gestation [ $Total\ SA = \beta_0 + \beta_1(\text{gender}) + \beta_2(\text{age}) + \beta_3(ICV^{0.754}) + \beta_4(\text{weeks of gestation}) + \beta_5(BW) + \beta_6(IQ) + \beta_7(\text{diagnosis})$ ].

Next, nine similar analyses were carried out using ROIs over relevant Brodmann’s areas [SA of ROI =  $\beta_0 + \beta_1(\text{gender}) + \beta_2(\text{age}) + \beta_3(ICV^{0.754}) + \beta_4(\text{weeks of gestation}) + \beta_5(BW) + \beta_6(IQ) + \beta_7(\text{diagnosis})$ ]. As shown in [Fig 1](#), the ROIs covered, in the right hemisphere, A) middle, superior and transverse temporal, inferior insula, orbital medial olfactory and intermediate regions between them; B) middle posterior, posterior dorsal and marginalis cingulate regions, plus the paracentral area; C) subcallosal and frontal superior gyri, including the suborbital sulcus; and D) temporal pole. In the left hemisphere, ROIs were at E) temporal inferior gyrus, F) a cluster including the subcallosal, anterior cingulate and suborbital regions, G) middle and superior temporal cortex, H) orbital gyrus and H-shaped orbital sulcus, and I) frontal superior region. As discussed below, the Bonferroni correction to the statistical significance threshold was used for this set of regressions ( $p_{Bonferroni} = 0.05 / 9 = 0.0056$ ). ROIs A, B, C, E and F were defined from a study of normal BW variation in the general population [13], whereas ROIs D, G, H and I were previously associated with (environmentally-driven) MZ twin pair differences in BW [12]. As discussed above (see [Introduction](#)), all these candidate areas have been shown relevance for neuropsychiatric outcomes [17–19].

Then, with the aim of evaluating whether lower BW within a twin pair was associated with smaller intrapair SA, regression models using twin pair differences [58,61] were applied. While structural equation modeling allows parsing out the specific genetic, shared and unique environmental factors underlying phenotypic relationships in relatively large samples of both MZ and dizygotic twins [62,63], it is not suited for the current sample with a moderate number of MZ twin pairs. In contrast, other statistical approaches based on regression modeling have been developed to be used with MZ twin data, and their usefulness and feasibility have been proven even for relatively small samples [58,61]. Since previous reports indicate that the

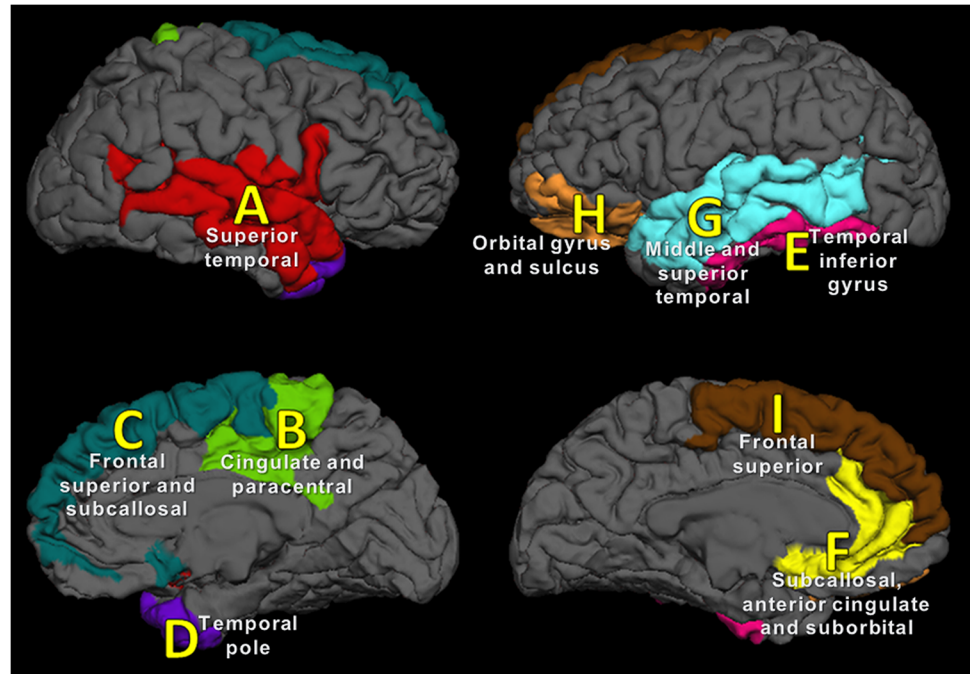

**Fig 1. Nine anatomical ROIs for analysis of associations between SA and any of BW, IQ or depression/anxiety.** Additional details on ROI selection and nomenclature can be found in *Methods*.

doi:10.1371/journal.pone.0129616.g001

association between BW and SA may largely be due to unique environmental factors [12,13], a common method to analyze (environmentally induced) differences within MZ twin pairs was adopted. Briefly, this approach consists in estimating the expected value of an outcome variable from:  $E(D_i^Y) = \beta_{W1}D_i^X + \beta_{W2}D_i^{X'} + \beta_{W3}D_i^{X''} + \dots$ , where the outcome variable (here, intrapair differences in cortical SA) is  $D_i^Y = Y_{i1} - Y_{i2}$ ; and the individual predictors are in the form  $D_i^X = X_{i1} - X_{i2}$ ,  $D_i^{X'} = X'_{i1} - X'_{i2}$ , and so on, with the set  $\{X, X', X'', \dots\}$  being the model predictors (here, ICV, IQ, BW and diagnostic, as mentioned below). The first subindex  $i$  stands for pair number, with  $i \in \{1, \dots, n\}$  (here,  $n = 24$  MZ pairs), and the second subindex  $j \in \{1, 2\}$  is the randomly assigned co-twin number.

In the previous model, the  $\beta_W$  coefficients for covariates with the same value for both co-twins (i.e., age) cancel out by the subtraction  $D_i^X = X_{i1} - X_{i2} = 0$ , and only the variables that may show intrapair differences are thus included.

Initially, total (intrapair) differences in BW and total (intrapair) differences in SA were analysed. In contrast to the previous regressions, neither gender nor age was included as covariates from this point on, as they had the same value for both twins in each pair. A regressor variable corresponding to differences in diagnostic status was included. The models applied to assess intrapair differences included the variables of interest (BW, IQ and diagnostic status) and ICV as a covariate [Intrapair differences in total SA =  $\beta_0$ (intrapair differences in  $ICV^{0.754}$ ) +  $\beta_1$ (intrapair differences in IQ) +  $\beta_2$ (intrapair differences in BW) +  $\beta_3$ (intrapair differences in diagnostic)].

Finally, to explore putative locations of origin for this last association, the nine ROIs were evaluated. Intrapair differences were tested following the technique mentioned in the preceding paragraph [Intrapair differences in SA of ROI =  $\beta_0$ (intrapair differences in  $ICV^{0.754}$ ) +  $\beta_1$ (intrapair differences in IQ) +  $\beta_2$ (intrapair differences in BW) +  $\beta_3$ (intrapair differences in

diagnosis)]. Correspondingly, Bonferroni adjustments were applied by considering  $p_{Bonferroni} = 0.05 / 9 = 0.0056$ .

As only 24 observations were included in the preceding tests of intrapair differences (one observation for each twin pair),  $p$ -values for this regression model were obtained from permutation tests, with the *lmPerm* R package [64]. Such permutation-based  $p$ -values are particularly suited to saturated experimental designs and datasets from non-normal populations or those with apparent outliers. Permutated  $p$ -values shown in the *Results* were in agreement with those obtained with ordinary least squares regressions.

## Results

[Table 1](#) shows descriptive sample data, arranged according to the psychopathological status of each twin pair (*concordant*, *discordant* or *healthy* pairs).

Among the three groups (*concordant*, *discordant* and *healthy*), no differences were found for either age, BW, IQ or total SA. ICV did show statistically significant inter-group differences ( $p = 0.009$ ), which were seemingly driven by the *concordant* group (Kruskal-Wallis X-square for *discordant* vs. *healthy*  $p = 0.286$ ), whose lower ICV mean value might have been due to the fact that there were 5 female and only 1 male pair. Consequently, adjustments for ICV were included in all subsequent tests (see [Methods](#)).

As a preliminary step, collinearity between BW and IQ, BW and diagnosis, and IQ and diagnosis were tested; none of them was found to be statistically significant.

### BW and cortical SA: direct association

When evaluating all 48 observations independently (i.e., correcting for the clustered origin of observations from twin pairs), we found associations between total cortical SA and both BW ( $\beta = 5.89$ ,  $t = 2.79$ ,  $p = 0.011$ ) and IQ ( $\beta = 299.2$ ,  $t = 2.67$ ,  $p = 0.015$ ). Nonetheless, total SA was not related to diagnosis of internalizing psychopathology ( $\beta = -2279.9$ ,  $t = -1.52$ ,  $p = 0.145$ ).

By examining the nine ROIs described above, it was found that the size of only one of them was associated with BW. Specifically, the dimension of ROI B, in the right cingulate and adjacent areas positively correlated with BW ( $\beta = 0.34$ ,  $t = 3.39$ ,  $p_{Bonferroni} = 0.026$ ). Similarly, IQ score was directly proportional to size of the left subcallosal, anterior cingulate and suborbital cluster (ROI F,  $\beta = 14.1$ ,  $t = 3.27$ ,  $p_{Bonferroni} = 0.034$ ) and also showed a trend towards association with the left temporal inferior gyrus (ROI E,  $\beta = 13.5$ ,  $t = 2.79$ ,  $p_{Bonferroni} = 0.099$ ) (see [Fig 1](#)). No association was found between the size of any of these ROIs and diagnostic status.

### Intrapair differences in BW and intrapair differences in cortical SA

Within a twin pair, smaller total cortical SA was associated with lower BW ( $\beta = 7.6$ ,  $p = 0.004$ ), but with no differences in either IQ ( $\beta = 125.5$ ,  $p = 0.2$ ) or diagnostic status ( $\beta = -1677.3$ ,  $p = 0.149$ ).

Finally, analysis of the nine ROIs detailed above showed that smaller intrapair area in the left middle and superior temporal cortical regions was related to lower BW within a pair (ROI G,  $\beta = 0.8$ ,  $p_{Bonferroni} = 0.029$ ) (see [Fig 1](#)). Intrapair differences in IQ and diagnosis had no effect on intrapair SA differences in these ROIs.

## Discussion

These results, from a middle-aged adult sample, support an association between low BW and reduced cortical SA, in line with previous findings in younger samples. Such an association was found at the level of both individuals and MZ-differences, and by evaluating both total and



ROI SA. Neither the internalizing (i.e., anxious-depressive) psychopathological status nor the IQ scores of the participants altered this association.

## BW and cortical SA

Initially, analysis was performed in order to search for influences of BW, IQ and diagnosis on cortical SA, across the 48 participants. BW was related to SA of the whole cortical mantle—each gram of BW accounted for approximately 5.94 mm<sup>2</sup> of adult SA—and of a region comprising the right cingulate and paracentral cortex. IQ was also associated with SA, in agreement with former publications showing larger brain volumes in people with higher IQ [20,21]. Specifically, higher IQ was correlated with larger total SA and larger SA of two regions in the left hemisphere: temporal inferior cortex and a cluster including cingulate, subcallosal and suborbital areas.

The analysis considered all subjects independently (i.e., as members of a general-population sample, correcting for the clustering of observations due to twin-pair relatedness). Remarkably, all associated ROIs (*B*, *E* and *F*, see Fig 1) corresponded to those derived from a study of a heterogeneous sample of healthy non-related individuals [13].

## Intrapair differences in BW and intrapair differences in cortical SA

As mentioned above, it is known that BW and SA are the result of both genetic and environmental influences. Accordingly, by examining MZ twin pair differences, additional analysis explored the relationship of exclusively environmental effects on both phenotypes. We found that, within a twin pair, lower BW is associated with smaller total SA. Every gram of intrapair disadvantage in BW was associated with an average reduction of approximately 7.6 mm<sup>2</sup> in total cortical SA in adulthood. By comparing this result with those of previous sections, it is feasible to infer that SA is particularly sensitive to environmentally-driven BW variation. ROI analysis of intrapair differences indicated that a region covering the left middle and superior temporal cortex was specifically susceptible to environmental factors affecting BW. This area (ROI G, see Fig 1) was defined from a previous study of small intrapair BW differences of MZ twins [12].

While it was possible to show that non-genetic influences on foetal growth provoke changes in brain morphology, this was not the case for IQ. The detected IQ-SA link may be due to either familial factors (genes and shared environment) or gene-environment interactions, but solely environmental effects on both IQ and SA (as detected by MZ pair differences) were not associated with each other. Notably, this is also consistent with previous indications of the genetic origins of the association between intelligence and brain volume [21] and more recent evidence that most of the cognitive ability-SA relationship may be accounted for by genetic factors [25]. Our results are in agreement with these studies and also suggest the existence of environmental factors that commonly affect BW and SA, but not IQ and SA.

Lastly, all these relationships persisted independently of diagnosis of anxious-depressive disorders; this implies the results are robust, despite a putative confounding effect of clinical traits. Although inconclusive, there is some evidence linking foetal growth and risk for adult depression and/or psychological distress [26,27]. Hence, one could expect some differential brain morphological effect depending on diagnostic criteria. Nevertheless, this was not the case in the analysis carried out here: our results indicate that BW alters SA regardless of internalizing psychopathology traits. Further research using distinct severity of psychopathological status may clarify potential diagnosis-specific effects.

## Limitations of the study

Finally, some limitations deserve consideration. First, the sample size is relatively small. Though replication using larger independent samples and with more severe phenotypic discordance is required, it is worth noting that the current findings are consistent with previous reports that show a long-lasting influence of early foetal growth alterations on adult brain morphology, which persist even despite the presence of psychotic psychopathology [11–13]. The present results partly replicate such studies in an independent sample, and suggest that the BW-SA relationship holds despite the presence of anxious/depressive disorders. This agreement probably suggests the presence of strong effect sizes for the above mentioned relationships.

Other putative limitation of this work is the phenotypical (i.e., clinical) heterogeneity across MZ twin groups, with an unbalanced distribution of concordant, discordant and healthy pairs. While cross-validating the present results with larger independent datasets from twin pairs with a narrower and more balanced phenotypic distribution is necessary, two features from the ongoing study should be noted. First, the clinical phenotype did not seem to modify any of the statistical associations described here. Namely, both BW-SA and IQ-SA associations were statistically significant across the diverse clinical-psychopathological composition of the MZ subgroups: the associations held across the set of all concordant, discordant and healthy pairs.

In addition, the only IQ measure employed here was derived from a full-scale assessment. While previous research indicates that both full-scale and performance IQ may be related to differences in BW of MZ co-twins [12], exploring the associations between performance IQ and BW may be difficult here mainly due to two reasons. First, using only a few intelligence subscales to build up a performance IQ measure may give rise to statistical distributions departing from normality. In this sense, the full-scale IQ measure was computed by averaging over a relatively large number of intelligence subscales, thus approaching a robust and normally-distributed variable. Secondly, in the larger UB twin registry dataset ( $n > 200$  co-twins), not all IQ subscales seem associated with BW, seemingly due to the moderate (average) intra-pair difference in BW. Importantly, the associations described here between cortical SA and IQ are in agreement with former reports and show consistency with biological mechanisms proposed by recent literature.

## Conclusion

The present study supports previous findings indicating that BW has a long-lasting effect on cortical SA, where a mixture of familial (genes and shared environment) and solely environmental interactions may influence both foetal growth and brain morphology; and environmental factors affecting BW have a specific effect on SA as well: a portion of SA which is entirely driven by the environment seems to be modified by the fraction of BW that is also determined by non-genetic influences. This distinction is particularly interesting given that ROI analysis indicate that the left temporal cortex is sensitive to environmental influences on BW, but it is not determined by the whole BW variation; which indicates that diverse determinants of BW (genes, environment and their interplay) may affect SA differently. Additionally, higher IQ scores correlate with larger SA; this relationship does not seem to be driven by unique environmental factors. None of these associations were modified by the presence of internalizing (anxious-depressive) disorders.

## Acknowledgments

Supported by the Spanish SAF2008-05674, European Twins Study Network on Schizophrenia Research Training Network (grant number EUTwinsS; MRTN-CT-2006-035987), the Catalan

2014SGR1636 and the PIM2010-ERN-00642 in frame of ERA-NET NEURON. Special thanks are given to all twin pairs who participated in this study. We are indebted to the Medical Image core facility of the Institut d'Investigacions Biomèdiques August Pi i Sunyer (IDIBAPS) for the technical help. Ximena Goldberg, PhD, and MRI technicians César Garrido and Santi Sotés contributed to this work. A. Córdova-Palomera was funded by The National Council for Science and Technology (CONACyT, Mexico).

## Author Contributions

Conceived and designed the experiments: ACP SA LF. Performed the experiments: ACP SA CF NB LF. Analyzed the data: ACP SA CF. Contributed reagents/materials/analysis tools: NB BCF IN LF. Wrote the paper: ACP MFV CF NB SA BCF IN LF. Interviewed the participants: SA. Pre-processed MRI data: ACP CF.

## References

1. Bilbo SD, Schwarz JM (2009) Early-life programming of later-life brain and behavior: a critical role for the immune system. *Front Behav Neurosci* 3: 14. doi: [10.3389/neuro.08.014.2009](https://doi.org/10.3389/neuro.08.014.2009) PMID: [19738918](https://pubmed.ncbi.nlm.nih.gov/19738918/)
2. Mwaniki MK, Atieno M, Lawn JE, Newton CR (2012) Long-term neurodevelopmental outcomes after intrauterine and neonatal insults: a systematic review. *Lancet* 379: 445–452. doi: [10.1016/S0140-6736\(11\)61577-8](https://doi.org/10.1016/S0140-6736(11)61577-8) PMID: [22244654](https://pubmed.ncbi.nlm.nih.gov/22244654/)
3. Bjuland KJ, Lohaugen GC, Martinussen M, Skranes J (2013) Cortical thickness and cognition in very-low-birth-weight late teenagers. *Early Hum Dev* 89: 371–380. doi: [10.1016/j.earlhumdev.2012.12.003](https://doi.org/10.1016/j.earlhumdev.2012.12.003) PMID: [23273486](https://pubmed.ncbi.nlm.nih.gov/23273486/)
4. Skranes J, Lohaugen GC, Martinussen M, Haberg A, Brubakk AM, Dale AM (2013) Cortical surface area and IQ in very-low-birth-weight (VLBW) young adults. *Cortex* 49: 2264–2271. doi: [10.1016/j.cortex.2013.06.001](https://doi.org/10.1016/j.cortex.2013.06.001) PMID: [23845237](https://pubmed.ncbi.nlm.nih.gov/23845237/)
5. Zubiaurre-Elorza L, Soria-Pastor S, Junque C, Sala-Llonch R, Segarra D, Bargallo N, et al. (2012) Cortical thickness and behavior abnormalities in children born preterm. *PLoS ONE* 7: e42148. doi: [10.1371/journal.pone.0042148](https://doi.org/10.1371/journal.pone.0042148) PMID: [22860067](https://pubmed.ncbi.nlm.nih.gov/22860067/)
6. Toga AW, Thompson PM, Sowell ER (2006) Mapping brain maturation. *Trends Neurosci* 29: 148–159. PMID: [16472876](https://pubmed.ncbi.nlm.nih.gov/16472876/)
7. Viding E, McCrory EJ (2012) Genetic and neurocognitive contributions to the development of psychopathy. *Dev Psychopathol* 24: 969–983. doi: [10.1017/S095457941200048X](https://doi.org/10.1017/S095457941200048X) PMID: [22781866](https://pubmed.ncbi.nlm.nih.gov/22781866/)
8. Bigos KL, Weinberger DR (2010) Imaging genetics—days of future past. *Neuroimage* 53: 804–809. doi: [10.1016/j.neuroimage.2010.01.035](https://doi.org/10.1016/j.neuroimage.2010.01.035) PMID: [20080192](https://pubmed.ncbi.nlm.nih.gov/20080192/)
9. Fatjo-Vilas M, Pomarol-Clotet E, Salvador R, Monte GC, Gomar JJ, Sarro S, et al. (2012) Effect of the interleukin-1beta gene on dorsolateral prefrontal cortex function in schizophrenia: a genetic neuroimaging study. *Biol Psychiatry* 72: 758–765. doi: [10.1016/j.biopsych.2012.04.035](https://doi.org/10.1016/j.biopsych.2012.04.035) PMID: [22763186](https://pubmed.ncbi.nlm.nih.gov/22763186/)
10. Jaffee SR, Price TS, Reyes TM (2013) Behavior genetics: past, present, future. *Dev Psychopathol* 25: 1225–1242. doi: [10.1017/S0954579413000588](https://doi.org/10.1017/S0954579413000588) PMID: [24342837](https://pubmed.ncbi.nlm.nih.gov/24342837/)
11. Haukvik UK, Rimol LM, Roddey JC, Hartberg CB, Lange EH, Vaskinn A, et al. (2014) Normal birth weight variation is related to cortical morphology across the psychosis spectrum. *Schizophr Bull* 40: 410–419. doi: [10.1093/schbul/sbt005](https://doi.org/10.1093/schbul/sbt005) PMID: [23419977](https://pubmed.ncbi.nlm.nih.gov/23419977/)
12. Raznahan A, Greenstein D, Lee NR, Clasen LS, Giedd JN (2012) Prenatal growth in humans and postnatal brain maturation into late adolescence. *Proc Natl Acad Sci U S A* 109: 11366–11371. doi: [10.1073/pnas.1203350109](https://doi.org/10.1073/pnas.1203350109) PMID: [22689983](https://pubmed.ncbi.nlm.nih.gov/22689983/)
13. Walhovd KB, Fjell AM, Brown TT, Kuperman JM, Chung Y, Hagler DJ, et al. (2012) Long-term influence of normal variation in neonatal characteristics on human brain development. *Proc Natl Acad Sci U S A* 109: 20089–20094. doi: [10.1073/pnas.1208180109](https://doi.org/10.1073/pnas.1208180109) PMID: [23169628](https://pubmed.ncbi.nlm.nih.gov/23169628/)
14. Panizzon MS, Fennema-Notestine C, Eyer LT, Jernigan TL, Prom-Wormley E, Neale M, et al. (2009) Distinct genetic influences on cortical surface area and cortical thickness. *Cereb Cortex* 19: 2728–2735. doi: [10.1093/cercor/bhp026](https://doi.org/10.1093/cercor/bhp026) PMID: [19299253](https://pubmed.ncbi.nlm.nih.gov/19299253/)
15. Valero De Bernabe J, Soriano T, Albaladejo R, Juarranz M, Calle ME, Martinez D, et al. (2004) Risk factors for low birth weight: a review. *Eur J Obstet Gynecol Reprod Biol* 116: 3–15. PMID: [15294360](https://pubmed.ncbi.nlm.nih.gov/15294360/)
16. Yaghootkar H, Freathy RM (2012) Genetic origins of low birth weight. *Curr Opin Clin Nutr Metab Care* 15: 258–264. doi: [10.1097/MCO.0b013e328351f543](https://doi.org/10.1097/MCO.0b013e328351f543) PMID: [22406741](https://pubmed.ncbi.nlm.nih.gov/22406741/)

17. Almeida LG, Ricardo-Garcell J, Prado H, Barajas L, Fernandez-Bouzas A, Avila D, et al. (2010) Reduced right frontal cortical thickness in children, adolescents and adults with ADHD and its correlation to clinical variables: a cross-sectional study. *J Psychiatr Res* 44: 1214–1223. doi: [10.1016/j.jpsychires.2010.04.026](https://doi.org/10.1016/j.jpsychires.2010.04.026) PMID: [20510424](https://pubmed.ncbi.nlm.nih.gov/20510424/)
18. Haukvik UK, Lawyer G, Bjerkan PS, Hartberg CB, Jonsson EG, McNeil T, et al. (2009) Cerebral cortical thickness and a history of obstetric complications in schizophrenia. *J Psychiatr Res* 43: 1287–1293. doi: [10.1016/j.jpsychires.2009.05.001](https://doi.org/10.1016/j.jpsychires.2009.05.001) PMID: [19473666](https://pubmed.ncbi.nlm.nih.gov/19473666/)
19. Takei Y, Suda M, Aoyama Y, Yamaguchi M, Sakurai N, Narita K, et al. (2013) Temporal lobe and inferior frontal gyrus dysfunction in patients with schizophrenia during face-to-face conversation: a near-infrared spectroscopy study. *J Psychiatr Res* 47: 1581–1589. doi: [10.1016/j.jpsychires.2013.07.029](https://doi.org/10.1016/j.jpsychires.2013.07.029) PMID: [23978395](https://pubmed.ncbi.nlm.nih.gov/23978395/)
20. McDaniel MA (2005) Big-brained people are smarter: A meta-analysis of the relationship between in vivo brain volume and intelligence. *Intelligence* 33: 337–346.
21. Posthuma D, De Geus EJ, Baare WF, Hulshoff Pol HE, Kahn RS, Boomsma DI (2002) The association between brain volume and intelligence is of genetic origin. *Nat Neurosci* 5: 83–84. PMID: [11818967](https://pubmed.ncbi.nlm.nih.gov/11818967/)
22. Huang C, Martorell R, Ren A, Li Z (2013) Cognition and behavioural development in early childhood: the role of birth weight and postnatal growth. *Int J Epidemiol* 42: 160–171. doi: [10.1093/ije/dys207](https://doi.org/10.1093/ije/dys207) PMID: [23243117](https://pubmed.ncbi.nlm.nih.gov/23243117/)
23. Raikkonen K, Forsen T, Henriksson M, Kajantie E, Heinonen K, Pesonen AK, et al. (2009) Growth trajectories and intellectual abilities in young adulthood: The Helsinki Birth Cohort study. *Am J Epidemiol* 170: 447–455. doi: [10.1093/aje/kwp132](https://doi.org/10.1093/aje/kwp132) PMID: [19528290](https://pubmed.ncbi.nlm.nih.gov/19528290/)
24. Rajput S, Hassiotis A, Richards M, Hatch SL, Stewart R (2011) Associations between IQ and common mental disorders: the 2000 British National Survey of Psychiatric Morbidity. *Eur Psychiatry* 26: 390–395. doi: [10.1016/j.eurpsy.2010.07.002](https://doi.org/10.1016/j.eurpsy.2010.07.002) PMID: [20933370](https://pubmed.ncbi.nlm.nih.gov/20933370/)
25. Vuoksima E, Panizzon MS, Chen CH, Fiecas M, Eyerl LT, Fennema-Notestine C, et al. (2014) The Genetic Association Between Neocortical Volume and General Cognitive Ability Is Driven by Global Surface Area Rather Than Thickness. *Cereb Cortex*.
26. Cordova-Palomera A, Goldberg X, Alemany S, Nenadic I, Gasto C, Fañanás L. (2014) Letter to the editor: low birth weight and adult depression: eliciting their association. *Psychol Med* 44: 1117–1119. doi: [10.1017/S0033291713002754](https://doi.org/10.1017/S0033291713002754) PMID: [24229470](https://pubmed.ncbi.nlm.nih.gov/24229470/)
27. Wojcik W, Lee W, Colman I, Hardy R, Hotopf M (2013) Foetal origins of depression? A systematic review and meta-analysis of low birth weight and later depression. *Psychol Med* 43: 1–12. doi: [10.1017/S0033291712000682](https://doi.org/10.1017/S0033291712000682) PMID: [22717127](https://pubmed.ncbi.nlm.nih.gov/22717127/)
28. Odlaug BL, Chamberlain SR, Derbyshire KL, Leppink EW, Grant JE (2014) Impaired response inhibition and excess cortical thickness as candidate endophenotypes for trichotillomania. *J Psychiatr Res*.
29. Venkatasubramanian G, Zutshi A, Jindal S, Srikanth SG, Kovoor JM, Kumar JK, et al. (2012) Comprehensive evaluation of cortical structure abnormalities in drug-naive, adult patients with obsessive-compulsive disorder: a surface-based morphometry study. *J Psychiatr Res* 46: 1161–1168. doi: [10.1016/j.jpsychires.2012.06.003](https://doi.org/10.1016/j.jpsychires.2012.06.003) PMID: [22770508](https://pubmed.ncbi.nlm.nih.gov/22770508/)
30. Wagner G, Schultz CC, Koch K, Schachtzabel C, Sauer H, Schlosser RG (2012) Prefrontal cortical thickness in depressed patients with high-risk for suicidal behavior. *J Psychiatr Res* 46: 1449–1455. doi: [10.1016/j.jpsychires.2012.07.013](https://doi.org/10.1016/j.jpsychires.2012.07.013) PMID: [22868048](https://pubmed.ncbi.nlm.nih.gov/22868048/)
31. Yoon S, Jun CS, Jeong HS, Lee S, Lim SM, Ma J, et al. (2013) Altered cortical gyrification patterns in panic disorder: deficits and potential compensation. *J Psychiatr Res* 47: 1446–1454. doi: [10.1016/j.jpsychires.2013.06.015](https://doi.org/10.1016/j.jpsychires.2013.06.015) PMID: [23871448](https://pubmed.ncbi.nlm.nih.gov/23871448/)
32. Mosing MA, Gordon SD, Medland SE, Statham DJ, Nelson EC, Heath AC, et al. (2009) Genetic and environmental influences on the co-morbidity between depression, panic disorder, agoraphobia, and social phobia: a twin study. *Depress Anxiety* 26: 1004–1011. doi: [10.1002/da.20611](https://doi.org/10.1002/da.20611) PMID: [19750555](https://pubmed.ncbi.nlm.nih.gov/19750555/)
33. Ressler KJ, Mayberg HS (2007) Targeting abnormal neural circuits in mood and anxiety disorders: from the laboratory to the clinic. *Nat Neurosci* 10: 1116–1124. PMID: [17726478](https://pubmed.ncbi.nlm.nih.gov/17726478/)
34. Wittchen HU, Nocon A, Beesdo K, Pine DS, Hofler M, Lieb R, et al. (2008) Agoraphobia and panic. Prospective-longitudinal relations suggest a rethinking of diagnostic concepts. *Psychother Psychosom* 77: 147–157. doi: [10.1159/000116608](https://doi.org/10.1159/000116608) PMID: [18277061](https://pubmed.ncbi.nlm.nih.gov/18277061/)
35. Zbozinek TD, Rose RD, Wolitzky-Taylor KB, Sherbourne C, Sullivan G, Stein MB, et al. (2012) Diagnostic overlap of generalized anxiety disorder and major depressive disorder in a primary care sample. *Depress Anxiety* 29: 1065–1071. doi: [10.1002/da.22026](https://doi.org/10.1002/da.22026) PMID: [23184657](https://pubmed.ncbi.nlm.nih.gov/23184657/)
36. Kroes MC, Rugg MD, Whalley MG, Brewin CR (2011) Structural brain abnormalities common to post-traumatic stress disorder and depression. *J Psychiatry Neurosci* 36: 256–265. doi: [10.1503/jpn.100077](https://doi.org/10.1503/jpn.100077) PMID: [21418787](https://pubmed.ncbi.nlm.nih.gov/21418787/)

37. van Tol MJ, van der Wee NJ, van den Heuvel OA, Nielen MM, Demenescu LR, Aleman A, et al. (2010) Regional brain volume in depression and anxiety disorders. *Arch Gen Psychiatry* 67: 1002–1011. doi: [10.1001/archgenpsychiatry.2010.121](https://doi.org/10.1001/archgenpsychiatry.2010.121) PMID: [20921116](https://pubmed.ncbi.nlm.nih.gov/20921116/)
38. Tamnes CK, Walhovd KB, Dale AM, Ostby Y, Grydeland H, Richardson G, et al. (2013) Brain development and aging: overlapping and unique patterns of change. *Neuroimage* 68: 63–74. doi: [10.1016/j.neuroimage.2012.11.039](https://doi.org/10.1016/j.neuroimage.2012.11.039) PMID: [23246860](https://pubmed.ncbi.nlm.nih.gov/23246860/)
39. Guilherme R, Drunat S, Delezoide AL, Oury JF, Luton D (2009) Zygosity and chorionicity in triplet pregnancies: new data. *Hum Reprod* 24: 100–105. doi: [10.1093/humrep/den364](https://doi.org/10.1093/humrep/den364) PMID: [18945712](https://pubmed.ncbi.nlm.nih.gov/18945712/)
40. Alemany S, Mas A, Goldberg X, Falcon C, Fatjo-Vilas M, Arias B, et al. (2013) Regional gray matter reductions are associated with genetic liability for anxiety and depression: An MRI twin study. *J Affect Disord* 149: 175–181. doi: [10.1016/j.jad.2013.01.019](https://doi.org/10.1016/j.jad.2013.01.019) PMID: [23433857](https://pubmed.ncbi.nlm.nih.gov/23433857/)
41. First MB (1997) Structured clinical interview for DSM-IV axis I disorders: SCID—I: clinician version: administration booklet. Washington, D.C.: American Psychiatric Press.
42. Kessler RC, Berglund P, Demler O, Jin R, Merikangas KR, Walters EE (2005) Lifetime prevalence and age-of-onset distributions of DSM-IV disorders in the National Comorbidity Survey Replication. *Arch Gen Psychiatry* 62: 593–602. PMID: [15939837](https://pubmed.ncbi.nlm.nih.gov/15939837/)
43. Sattler JM (2001) Assessment of children: cognitive applications. San Diego: J.M. Sattler.
44. Wechsler D, Cordero Pando A, Yela Granizo M, Zimmerman IL, Woo-Sam JM, Glasser AJ (1997) WAIS escala de inteligencia de Wechsler para adultos. Madrid; Barcelona: TEA Ediciones.
45. Walshe M, McDonald C, Boydell J, Zhao JH, Kravariti E, Touloupoulou T, et al. (2011) Long-term maternal recall of obstetric complications in schizophrenia research. *Psychiatry Res* 187: 335–340. doi: [10.1016/j.psychres.2011.01.013](https://doi.org/10.1016/j.psychres.2011.01.013) PMID: [21324530](https://pubmed.ncbi.nlm.nih.gov/21324530/)
46. Lewis SW, Owen MJ, Murray RM (1989) Obstetric complications and schizophrenia: methodology and mechanisms; Schulz SC, Tamminga CA, editors. New York: Oxford University Press.
47. Glinianaia SV, Skjaerven R, Magnus P (2000) Birthweight percentiles by gestational age in multiple births. A population-based study of Norwegian twins and triplets. *Acta Obstet Gynecol Scand* 79: 450–458. PMID: [10857868](https://pubmed.ncbi.nlm.nih.gov/10857868/)
48. Dale AM, Fischl B, Sereno MI (1999) Cortical surface-based analysis. I. Segmentation and surface reconstruction. *Neuroimage* 9: 179–194. PMID: [9931268](https://pubmed.ncbi.nlm.nih.gov/9931268/)
49. Fischl B, Liu A, Dale AM (2001) Automated manifold surgery: constructing geometrically accurate and topologically correct models of the human cerebral cortex. *IEEE Trans Med Imaging* 20: 70–80. PMID: [11293693](https://pubmed.ncbi.nlm.nih.gov/11293693/)
50. Fischl B, Salat DH, Busa E, Albert M, Dieterich M, Haselgrove C, et al. (2002) Whole brain segmentation: automated labeling of neuroanatomical structures in the human brain. *Neuron* 33: 341–355. PMID: [11832223](https://pubmed.ncbi.nlm.nih.gov/11832223/)
51. Fischl B, Salat DH, van der Kouwe AJ, Makris N, Segonne F, Quinn BT, et al. (2004) Sequence-independent segmentation of magnetic resonance images. *Neuroimage* 23 Suppl 1: S69–84. PMID: [15501102](https://pubmed.ncbi.nlm.nih.gov/15501102/)
52. Fischl B, Sereno MI, Tootell RB, Dale AM (1999) High-resolution intersubject averaging and a coordinate system for the cortical surface. *Hum Brain Mapp* 8: 272–284. PMID: [10619420](https://pubmed.ncbi.nlm.nih.gov/10619420/)
53. Winkler AM, Sabuncu MR, Yeo BT, Fischl B, Greve DN, Kochunov P, et al. (2012) Measuring and comparing brain cortical surface area and other areal quantities. *Neuroimage* 61: 1428–1443. doi: [10.1016/j.neuroimage.2012.03.026](https://doi.org/10.1016/j.neuroimage.2012.03.026) PMID: [22446492](https://pubmed.ncbi.nlm.nih.gov/22446492/)
54. Fischl B, van der Kouwe A, Destrieux C, Halgren E, Segonne F, Salat DH, et al. (2004) Automatically parcellating the human cerebral cortex. *Cereb Cortex* 14: 11–22. PMID: [14654453](https://pubmed.ncbi.nlm.nih.gov/14654453/)
55. Buckner RL, Head D, Parker J, Fotenos AF, Marcus D, Morris JC, et al. (2004) A unified approach for morphometric and functional data analysis in young, old, and demented adults using automated atlas-based head size normalization: reliability and validation against manual measurement of total intracranial volume. *Neuroimage* 23: 724–738. PMID: [15488422](https://pubmed.ncbi.nlm.nih.gov/15488422/)
56. R Development Core Team (2012) R: A language and environment for statistical computing. Vienna, Austria: R Foundation for Statistical Computing. doi: [10.1002/jcc.22917](https://doi.org/10.1002/jcc.22917) PMID: [22278855](https://pubmed.ncbi.nlm.nih.gov/22278855/)
57. Pinheiro J, Bates D, DebRoy S, Sarkar D, Team RDC (2015) nlme: Linear and Nonlinear Mixed Effects Models.
58. Carlin JB, Gurrin LC, Sterne JA, Morley R, Dwyer T (2005) Regression models for twin studies: a critical review. *Int J Epidemiol* 34: 1089–1099. PMID: [16087687](https://pubmed.ncbi.nlm.nih.gov/16087687/)
59. Hu FB, Goldberg J, Hedeker D, Henderson WG (1998) Modelling ordinal responses from co-twin control studies. *Stat Med* 17: 957–970. PMID: [9612884](https://pubmed.ncbi.nlm.nih.gov/9612884/)

60. Visscher PM, Benyamin B, White I (2004) The use of linear mixed models to estimate variance components from data on twin pairs by maximum likelihood. *Twin Res* 7: 670–674. PMID: [15607018](#)
61. Córdova-Palomera A (2015) *mztwinreg: Regression Models for Monozygotic Twin Data*.
62. Draisma HHM (2011) Analysis of metabolomics data from twin families: Division of Analytical Biosciences, Leiden/Amsterdam Center for Drug Research (LACDR), Faculty of Science, Leiden University.
63. Rijdsdijk FV, Sham PC (2002) Analytic approaches to twin data using structural equation models. *Brief Bioinform* 3: 119–133. PMID: [12139432](#)
64. Wheeler B (2010) *ImPerm: Permutation tests for linear models*.
